1 **High prevalence of SARS-CoV-2 antibodies in pets from COVID-19+ households**

2  
3 Matthieu Fritz<sup>1§</sup>, Béatrice Rosolen<sup>2§</sup>, Emilie Krafft<sup>3£</sup>, Pierre Becquart<sup>1£</sup>, Eric Elguero<sup>1</sup>, Oxana Vratskikh<sup>4</sup>,  
4 Solène Denolly<sup>5</sup>, Bertrand Boson<sup>5</sup>, Jessica Vanhomwegen<sup>4,6</sup>, Meriadeg Ar Gouilh<sup>7,8</sup>, Angeli Kodjo<sup>3</sup>,  
5 Catherine Chirouze<sup>2,9</sup>, Serge Rosolen<sup>10,11</sup>, Vincent Legros<sup>3,5‡\*</sup>, Eric M. Leroy<sup>1‡\*</sup>

6  
7 **Authors' Affiliation :**

8 <sup>1</sup> Institut de Recherches et de Développement (IRD), Maladies Infectieuses et vecteurs: Ecologie,  
9 génétique, Evolution et Contrôle (MIVEGEC) (IRD 224 - CNRS 5290 - UM), Montpellier, France (

10 <sup>2</sup> Service de maladies infectieuses et tropicales, CHRU hôpital Jean-Minjoz, Besançon, France

11 <sup>3</sup> Université de Lyon, VetAgro Sup, Campus vétérinaire de Lyon, Marcy-l'Etoile, France

12 <sup>4</sup> Environment and Infectious Risk Unit, Laboratory for Urgent Response to Biological Threats, Institut  
13 Pasteur, Paris, France.

14 <sup>5</sup> CIRI – Centre International de Recherche en Infectiologie, Team EVIR, Univ Lyon, Université Claude  
15 Bernard Lyon 1, Inserm, U111, CNRS, UMR5308, ENS Lyon, Lyon, France.

16 <sup>6</sup> The OIE Collaborating Centre for Detection and Identification in Humans of Emerging Animal  
17 Pathogens, Institut Pasteur, Paris, France.

18 <sup>7</sup> Groupe de Recherche sur l'Adaptation Microbienne (GRAM 2.0), Normandie Univ, UNICAEN,  
19 UNIROUEN, EA2656, Caen, France.

20 <sup>8</sup> Laboratoire de Virologie, Centre Hospitalo-Universitaire, Caen, France.

21 <sup>9</sup> UMR Chrono-Environnement - Université de Bourgogne Franche-Comté, Besançon, France

22 <sup>10</sup> Sorbonne Université, INSERM, CNRS, Institut de la Vision, Paris, France

23 <sup>11</sup> Clinique Veterinaire Voltaire, Asnieres, France.

24  
25 <sup>§</sup> Drs. Fritz and Rosolen contributed equally to this article

26 <sup>£</sup> Drs. Krafft and Becquart contributed equally to this article

27 <sup>‡</sup> Drs. Legros and Leroy contributed equally to this article

28  
29 **Corresponding author:**

30 **Vincent Legros:** CIRI, 46 allée d'Italie 69007 Lyon, France

31 Tel : +33 472728727; E-mail address : [vincent.legros@vetagro-sup.fr](mailto:vincent.legros@vetagro-sup.fr)

32 **Eric M.Leroy :** UMR IRD-CNRS-UM, 911 avenue Agropolis, 34394 Montpellier, France

33 Tel : +33 467416107 ; E-mail address : [eric.leroy@ird.fr](mailto:eric.leroy@ird.fr)

34

35 **Abstract**

36 In a survey of household cats and dogs of laboratory-confirmed COVID-19 patients, we found a high  
37 seroprevalence of SARS-CoV-2 antibodies, ranging from 21% to 53%, depending on the positivity  
38 criteria chosen. Seropositivity was significantly greater among pets from COVID-19+ households  
39 compared to those with owners of unknown status. Our results highlight the potential role of pets in  
40 the spread of the epidemic.

41

42 **Main**

43 Since its emergence in December 2019, in Wuhan, China, Respiratory Syndrome Coronavirus 2 (SARS-  
44 CoV-2) has spread throughout the world, probably exclusively through human-to-human  
45 transmission. However, the existence of hundreds of millions of companion animals living closely  
46 with humans raises the question of their susceptibility to infection and potential role in the outbreak.  
47 Cats and dogs are known to be infected by Alphacoronaviruses and Betacoronavirus (Feline CoVs,  
48 Canine CoVs)<sup>1</sup>, and thus may be susceptible to SARS-CoV-2, which also belongs to the  
49 Betacoronavirus group. In Europe, the prevalence of canine coronavirus infection is low<sup>2</sup>. Feline  
50 coronavirus prevalence is higher<sup>3-5</sup>, with typical seroprevalence ranging from 50% in healthy Swiss  
51 cats to 37% in Japan. Additionally, epidemiological, biological, and virological characteristics of  
52 coronaviruses, mainly based on Spike-protein plasticity, suggest species barriers to infection may be  
53 easily crossed. Thus, pet contamination by sick owners is not only likely but perhaps expected, given  
54 the numerous opportunities for spillover<sup>6-8</sup>. The observation of several cases of mild infections in  
55 dogs and cats of infected owners, and serological surveys of pet populations reporting infection rates  
56 ranging from 0% to 15,8%<sup>9-12</sup>, highlight this risk. Yet, despite these observations, studies continue to  
57 suggest that the risk of contamination of pets by their owners is low and that the role of pets in the  
58 spread of the outbreak is trivial or nonexistent.  
59 Presently there is no published study accurately assessing the contamination levels in household  
60 pets. Here we present results from a serological survey of pets conducted between May and June

61 2020 in two neighbouring regions of eastern France: Franche-Comté and Rhone-Alpes. Both regions  
62 had similar epidemiological characteristics and health management policies, with the first  
63 hospitalised deaths registered in March 2020 ([https://www.gouvernement.fr/info-coronavirus/carte-](https://www.gouvernement.fr/info-coronavirus/carte-et-donnees)  
64 [et-donnees](https://www.gouvernement.fr/info-coronavirus/carte-et-donnees)). The first group of pets, from the Franche-Comté region, were living in homes where at  
65 least one person expressed respiratory symptoms and tested positive for SARS-CoV-2 at the  
66 University Hospital of Besançon (COVID-19+ household group). The second group, from the Rhone-  
67 Alpes, were pets from households where exposure was unknown (unknown status household group).  
68 Lastly, we included a control group of animals sampled in 2018 and early 2019 before the outbreak,  
69 including hyperimmune sera from ten cats with feline infectious peritonitis virus (FIPV), (Control  
70 group). Inclusion FIPV-infected cat sera in the control group allows us to exclude possible cross-  
71 reactivity of antibodies generated in response to non-SARS-CoV-2 coronaviruses.

72  
73 We combined four different tests based on two different techniques to ensure the greatest degree of  
74 specific-antibody detection. Three microsphere immunoassays (MIA) detected anti-SARS-CoV-2 IgGs  
75 produced in response to viral N, S1, or S2 proteins, and a retrovirus-based pseudoparticle assay  
76 detected SARS-CoV-2 neutralizing antibodies (Methods). Taking into account these two types of  
77 assays, animals were declared COVID-19 positive following a positive seroneutralization assay or if  
78 they were positive for all three MIA tests. This positivity criterion ensures 100% specificity, as none of  
79 the animals in the control group tested positive for the three MIAs or for seroneutralisation (Fig. 1a-  
80 d).

81 A remarkably high 21.3% (10 of 47 animals tested) of pets in COVID-19+ households tested positive,  
82 including 23.5% of cats (8/34) and 15.4% of dogs (2/13), a non-significant difference ( $p=0.70$ ) (Fig. 1a-  
83 e, Supplementary tables 1-2). Of the 16 cats and 22 dogs tested from households of unknown status,  
84 only one animal (a cat) tested positive (Fig. 1a-e, Supplementary tables 1-2), representing a  
85 significantly lower seroprevalence than the COVID-19+ group ( $p=0.0194$ ). The risk of testing

86 seropositive was eight times higher for pets sharing a home with a COVID-19+ person than for pets in  
87 homes of unknown status (relative risk of being seropositive = 8.1).

88

89 Though we cannot definitively prove that all the ten positive animals were infected with SARS-CoV-2,  
90 the much greater seroprevalence in animals from COVID-19+ households provides strong evidence  
91 that pets have been infected with SARS-CoV-2.

92 The highly variable antibody responses to SARS-CoV-2 in human infections<sup>13,14</sup>, calls into question our  
93 strict criteria for defining seropositive tests. If we consider an animal seropositive if any one test was  
94 positive, 53.2% in pets from COVID-19+ households show signs of having been infected (58.8% of  
95 cats (20/34) and 38.5% of dogs (5/13)) compared to 15.8% (6/38) of pets in homes of unknown  
96 status.

97 A recent Swiss study found that anti-N antibody assays substantially underestimate (i.e., by 30% to  
98 45%) the proportion of SARS-CoV-2 exposed individuals compared to anti-S antibody assays in  
99 population-based seroprevalence studies<sup>15</sup>. Assuming similar dynamics in pets, the actual  
100 seropositivity in COVID-19+ households is likely closer to 53% than 21%, indicating that infection risk  
101 in the pets of COVID-19 positive owners is much higher than previously described. Given that cats  
102 and dogs may become infected, do they contribute to COVID-19 spread due to spillover back into  
103 humans? While viral shedding from pets does not appear sufficient for transmission to humans or  
104 other animals encountered during walks, for people in closer contact, precautionary measures  
105 should be considered as part of a 'one health' global control strategy.

106

107

108

109

110

## 111 **Methods**

112 The dataset generated during the current study are available from the corresponding authors on  
113 reasonable request.

114

### 115 **COVID19+ household group**

116 The COVID19+ household group was recruited from a cohort of 825 patients diagnosed with SARS-  
117 CoV-2 infection by reverse-transcriptase–polymerase-chain-reaction testing of nasopharyngeal  
118 swabs in the infectious tropical disease department at the University Hospital of Besançon between  
119 March 1 to April 25. From May 11 to 22, 384 patients were contacted and 84 reported owning dogs  
120 and/or cats. 34 gave us their informed consent to sample their pets. Whole blood samples were  
121 collected from 13 dogs and 34 cats between June 7 and June 12, 2 to 3 months after the owners  
122 were diagnosed.

123

### 124 **Unknown status household group**

125 The unknown status household group recruited volunteers among staff and students at VetAgro Sup  
126 (Lyon's National Veterinary School). Dogs and cats from all volunteers were included. The COVID-19  
127 status of the pet owners was unknown. Blood samples were obtained from each animal (no selection)  
128 from 14th of May to 4th of June 2020. Clinical examination at the time of sampling indicated that all  
129 animals were healthy. Sampling of animals for this study was approved by VetAgro Sup ethical  
130 committee (approval number n°2031).

131

### 132 **Neutralization activity measurement**

133 To measure the neutralizing activity in sera, we developed a MLV-based pseudoparticle carrying a  
134 GFP reporter pseudotyped with SARS-CoV2 spike (SARS-CoV-2pp). Briefly, SARS-CoV-2pp were  
135 incubated in 1/100 dilution of sera at 37°C for 1 hour. The mix was added on reporter cells (VeroE6),  
136 spinoculated for 2 hours (2.500g, 25°C). After 2 hours of incubation, the inoculum was removed and

137 replaced with fresh medium and cells were incubated for 72h before FACS analysis. The level of  
138 infectivity was expressed as % of GFP positive cells and compared to cells infected with SARS-CoV-  
139 2pp incubated without serum. Prepandemic (including non SARS-CoV2 coronaviruses positive) sera  
140 from France were used as negative controls, and anti-SARS-CoV-2 RBD antibody was used as positive  
141 control. Seroneutralization specificity was 100% as already described.

142

### 143 **Microsphere immunoassay**

144 Dog and cat serum samples were tested using a multiplex Microsphere immunoassay (MIA). 10 $\mu$ g of  
145 three recombinant SARS-CoV-2 antigens (nucleoprotein, spike subunit 1 and spike subunit 2) were  
146 used to capture specific serum antibodies, whereas a recombinant human protein (O<sup>6</sup>-methylguanine  
147 DNA methyltransferase) was used as a control antigen in the assay. Distinct MagPlex microsphere  
148 sets (Luminex Corp) were respectively coupled to viral or control antigens using the amine coupling  
149 kit (Bio-Rad Laboratories) according to manufacturers' instructions. This three microsphere  
150 immunoassays (MIA) were developed and provided by Institut Pasteur, Paris. The MIA procedure was  
151 performed by incubating the serum samples (50  $\mu$ l), diluted 1:400 in assay buffer (PBS-1% BSA-0.05%  
152 Tween 20), with the mixture of antigen-coated bead sets (about 1250 beads of each type) protected  
153 from the light on an orbital shaker at 700 rpm for 30 min. After washing, 50  $\mu$ l of biotinylated protein  
154 A and biotinylated protein G (Thermo Fisher Scientific) at a 4  $\mu$ g/ml each in assay buffer were  
155 transferred to each well and incubated on an orbital shaker for 30 min at 700 rpm in the dark. After  
156 washing, the beads were incubated for 10min at 700 rpm in the dark with 50  $\mu$ l of Streptavidin-R-  
157 Phycoerythrin (Life technologies) diluted to 4  $\mu$ g/mL in assay buffer. After washing, beads were  
158 resuspended in 100  $\mu$ l of assay buffer. Measurements were performed using a Magpix instrument  
159 (Luminex), at least 100 events were read for each bead set and binding events were displayed as  
160 median fluorescence intensities (MFI). Relative Fluorescence Intensities (RFI) were calculated for  
161 each sample by dividing the MFI signal measured for the antigen-coated microsphere sets by the MFI  
162 signal obtained for the control microsphere set, to account for nonspecific binding of antibodies to

163 beads. Specific seropositivity cut-off values for each antigen were set at three standard deviations  
164 above the mean RFI of the 37 dog (from France and Gabon) and 14 cat samples (from France) from  
165 the control group sampled before 2019. Based on the pre-pandemic population, MIA specificity was  
166 set at 97,3% for dogs and 100% for cats.

167

## 168 **Statistical analyses**

169 Fisher's exact test was used to analyze differences in antibody detection between the COVID19+  
170 household group and the unknown status household group, as well as tests comparing cats and dogs  
171 in COVID-19+ households.

172

## 173 **Acknowledgements**

174 We are grateful to the pet owners for giving us their permission to sample their pets. We thank all  
175 veterinarians that helped us with sampling, particularly Corentin Buisson, Julie Roggy and Maud  
176 Walliang for their important contribution to the sample collection and database. We thank Dr Thierry  
177 Buronfosse for the kind gift of pre-pandemic sera. We also thank Kurt McKean for English editing of  
178 the manuscript (<https://octopusediting.com/>). The study was funded by the French National Agency  
179 for Research (ANR-14-EBOL-003-01; Ebola virus in central Africa: genetic diversity, modalities of  
180 cross-species transmission and risk assessment of outbreak emergence, EBOFAQ), by IDEXLYON  
181 project of Université de Lyon as part of the "Programme Investissements d'Avenir" (ANR-16-IDEX-  
182 0005). This work was supported by French state funds managed by the Agence Nationale de la  
183 Recherche (ANR) within Programme Investissements d'Avenir, Institut Hospitalo-Universitaire  
184 FOReSIGHT (ANR-18-IAHU-0001) and Institut de Recherche pour le Développement (IRD).

185

186

187

188

189 **Author contributions**

190 V.L. and E.L. conceived the study.

191 M.F., B.R., E.K., P.B., E.R., O.V., S.D., B.B., J.V., A.K., V.L. and E.L. designed and performed the  
192 experiments.

193 M.F., B.R., E.K., A.K., V.L., E.L. designed the work

194 All authors analyzed the data and interpreted and discussed the results.

195 M.F., V.L. and E.L. wrote the manuscript with input from all authors.

196

197 **Competing Interests**

198 The authors declare no competing interests.

199

200 **References**

201

202 1. Le Poder, S. Feline and canine coronaviruses: common genetic and pathobiological features.

203 *Advances in virology* **2011**, 609465 (2011).

204 2. Stavisky, J., *et al.* Prevalence of canine enteric coronavirus in a cross-sectional survey of dogs  
205 presenting at veterinary practices. *Vet Microbiol* **140**, 18-24 (2010).

206 3. Bell, E.T., Toribio, J.A., White, J.D., Malik, R. & Norris, J.M. Seroprevalence study of feline  
207 coronavirus in owned and feral cats in Sydney, Australia. *Australian veterinary journal* **84**, 74-  
208 81 (2006).

209 4. Kummrow, M., *et al.* Feline coronavirus serotypes 1 and 2: seroprevalence and association  
210 with disease in Switzerland. *Clin Diagn Lab Immunol* **12**, 1209-1215 (2005).

211 5. Taharaguchi, S., Soma, T. & Hara, M. Prevalence of feline coronavirus antibodies in Japanese  
212 domestic cats during the past decade. *J Vet Med Sci* **74**, 1355-1358 (2012).

213 6. Andersen, K.G., Rambaut, A., Lipkin, W.I., Holmes, E.C. & Garry, R.F. The proximal origin of  
214 SARS-CoV-2. *Nature Medicine* **26**, 450-452 (2020).



- 215 7. Leroy, E.M., Ar Gouilh, M. & Brugère-Picoux, J. The risk of SARS-CoV-2 transmission to pets  
216 and other wild and domestic animals strongly mandates a one-health strategy to control the  
217 COVID-19 pandemic. *One Health*, 100133-100133 (2020).
- 218 8. Wan, Y., Shang, J., Graham, R., Baric, R.S. & Li, F. Receptor Recognition by the Novel  
219 Coronavirus from Wuhan: an Analysis Based on Decade-Long Structural Studies of SARS  
220 Coronavirus. *Journal of Virology* **94**, e00127-00120 (2020).
- 221 9. Chen, J., Huang, C., Zhang, Y., Zhang, S. & Jin, M. Severe Acute Respiratory Syndrome  
222 Coronavirus 2-Specific Antibodies in Pets in Wuhan, China. *The Journal of infection* (2020).
- 223 10. Deng, J., *et al.* Serological survey of SARS-CoV-2 for experimental, domestic, companion and  
224 wild animals excludes intermediate hosts of 35 different species of animals. *Transboundary  
225 and emerging diseases* (2020).
- 226 11. Sailleau, C., *et al.* First detection and genome sequencing of SARS-CoV-2 in an infected cat in  
227 France. *Transboundary and emerging diseases* (2020).
- 228 12. Sit, T.H.C., *et al.* Infection of dogs with SARS-CoV-2. *Nature* (2020).
- 229 13. Grzelak, L., *et al.* A comparison of four serological assays for detecting anti-SARS-CoV-2  
230 antibodies in human serum samples from different populations. *Science translational  
231 medicine* (2020).
- 232 14. Okba, N.M.A., *et al.* Severe Acute Respiratory Syndrome Coronavirus 2-Specific Antibody  
233 Responses in Coronavirus Disease Patients. *Emerging Infectious Disease journal* **26**, 1478  
234 (2020).
- 235 15. Fenwick, C., *et al.* Changes in SARS-CoV-2 Antibody Responses Impact the Estimates of  
236 Infections in Population-Based Seroprevalence Studies. *medRxiv*, 2020.2007.2014.20153536  
237 (2020).

238

239

240

241 **Figure Legend**

242 **Figure 1. High prevalence of SARS-CoV-2 antibodies in COVID19+ household pets**

243 Serological evaluation of anti-SARS-CoV-2 antibodies in pets from unknown status and COVID19+  
244 households. COVID19+ households had at least one COVID-19 laboratory-confirmed person (Green).  
245 Unknown status households were those with no confirmed SARS-CoV-2 infected person (Black).  
246 Control include pre-pandemic population (Grey) and FIPV infected cats (Brown). **a:** Anti-N antibody  
247 levels. **b:** Anti-S1 antibody levels. **c:** Anti-S2 antibody levels. SARS-CoV-2 specific antibody levels were  
248 assessed using MIAs and expressed as Relative Fluorescence Intensities (RFI) to control antigen. A pre-  
249 pandemic population was used to determine the cut-off (mean + 3\*standard deviation). **d:** Percentage  
250 of neutralizing activity in pet sera. Neutralising activity was assessed using a pseudoparticle assay and  
251 expressed as the percent neutralization relative to a no serum condition. For **a,b,c,d** mean line are  
252 presented. **e:** Prevalence based on positive anti-N, anti-S1, anti-S2, and seroneutralization tests in  
253 COVID19+ and unknown status households. 95% confidence interval are presented ( $\pm$  95% confidence  
254 intervals).

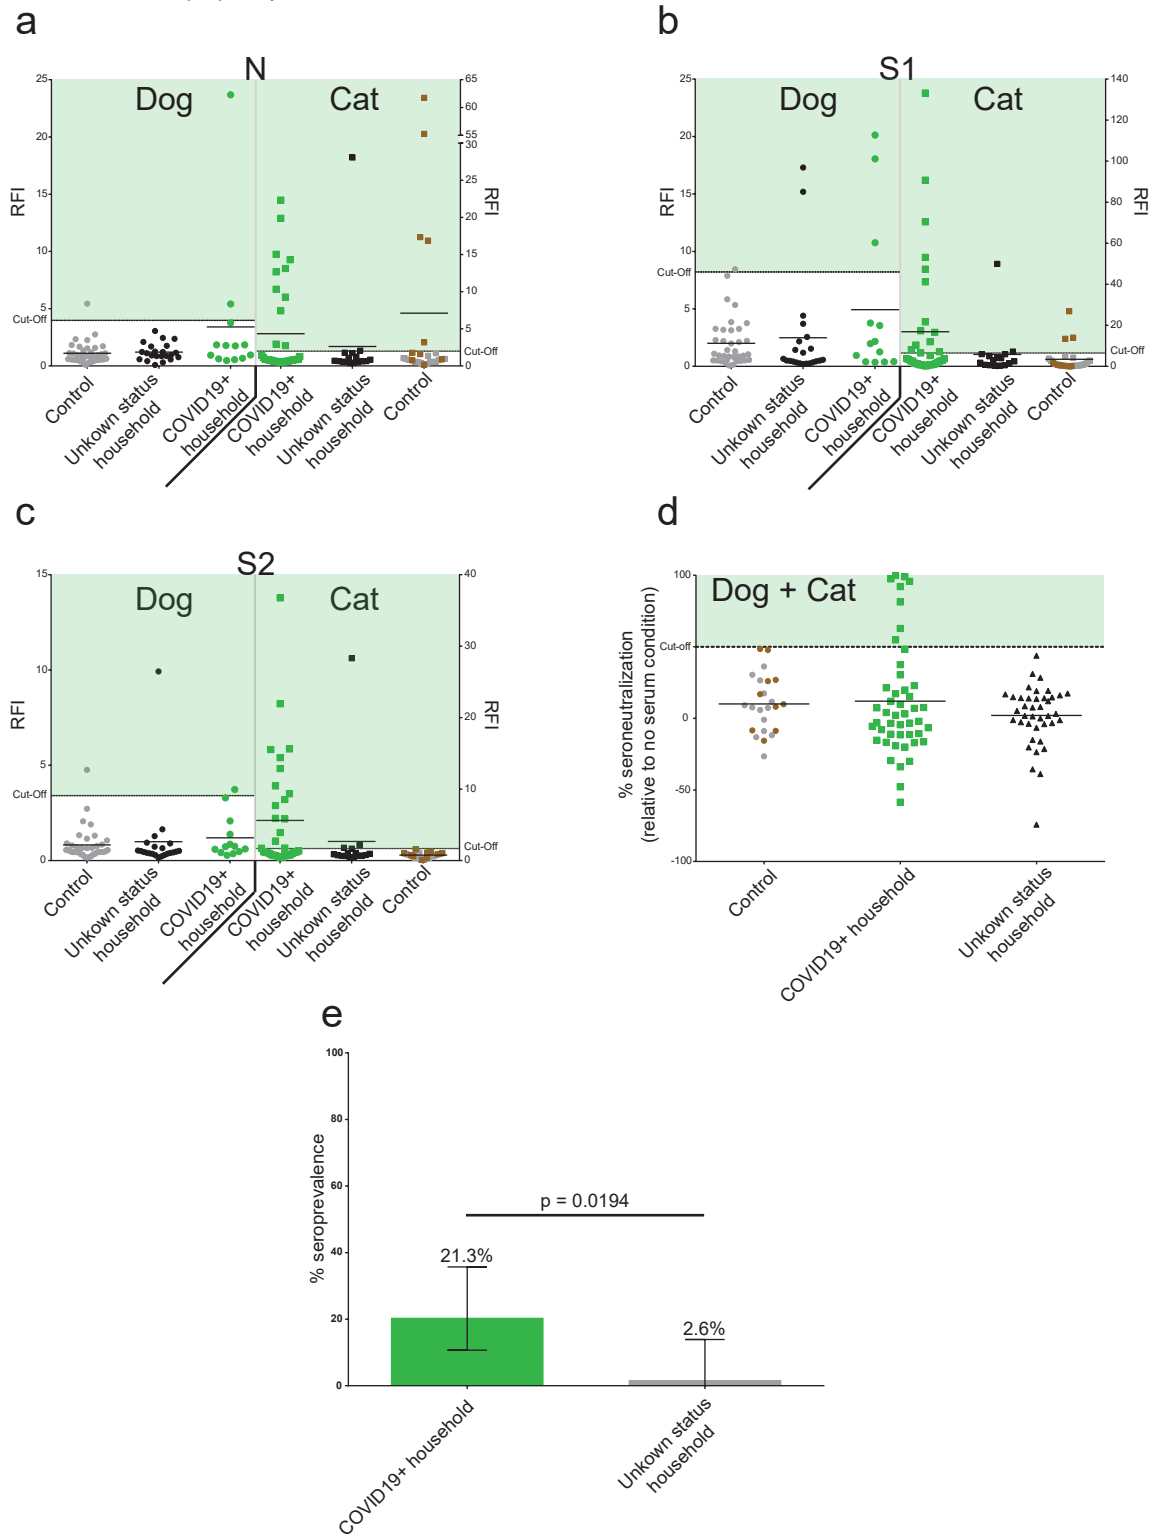

Source: http://biorxiv.org/content/10.1101/2020.09.22.307751v1.full.pdf
