# Supplementary material for: High prevalence of SARS-CoV-2 antibodies in pets from COVID-19+ households
Source: bioRxiv or medRxiv preprint supplement (doi:10.1101/2020.09.22.307751), 2020-09-22
Supplement: Supplementary file [file media-1.pdf]

1 **Supplementary Tables**

2

3 **Supplementary Table 1.** Summary of pet seropositivity according to the number of positive tests and  
 4 population.

|                               | Combination of the 4 serologies |             |             |                                 |                                  |                            |
|-------------------------------|---------------------------------|-------------|-------------|---------------------------------|----------------------------------|----------------------------|
|                               | 1 test MIA                      | 2 tests MIA | 3 tests MIA | 1 test MIA + Seroneutralization | 2 tests MIA + Seroneutralization | 3 MIA + Seroneutralization |
| Dogs COVID-19+ household      | 2 (15,4%)                       | 1 (7,7%)    | 0           | 2 (15,4%)                       | 0                                | 0                          |
| Cats COVID-19+ household      | 6 (17,6%)                       | 6 (17,6%)   | 2 (5,9%)    | 0                               | 1 (2,9%)                         | 5 (14,7%)                  |
| Dogs unknown status household | 1 (4,5%)                        | 1(4,5%)     | 0           | 0                               | 0                                | 0                          |
| Cats unknown status household | 2 (12,5%)                       | 1 (6,3%)    | 1 (6,3%)    | 0                               | 0                                | 0                          |

5

6 **Supplementary Table 2.** Summary of pet seropositivity according to the serologic test and population

|                               | Serologic test |    |    |                    |
|-------------------------------|----------------|----|----|--------------------|
|                               | N              | S1 | S2 | Seroneutralization |
| Dogs COVID-19+ household      | 2              | 3  | 1  | 2                  |
| Cats COVID-19+ household      | 11             | 14 | 16 | 6                  |
| Dogs unknown status household | 0              | 2  | 1  | 0                  |
| Cats unknown status household | 2              | 2  | 3  | 0                  |

7
